# Supplementary material for: In Vitro Expansion of Bone Marrow Derived Mesenchymal Stem Cells Alters DNA Double Strand Break Repair of Etoposide Induced DNA Damage
Source: Hindawi journal article supplement (doi:10.1155/2016/8270464), 2016-01-01
Supplement: f1 [file 8270464.f1.pdf]

## Supporting Information

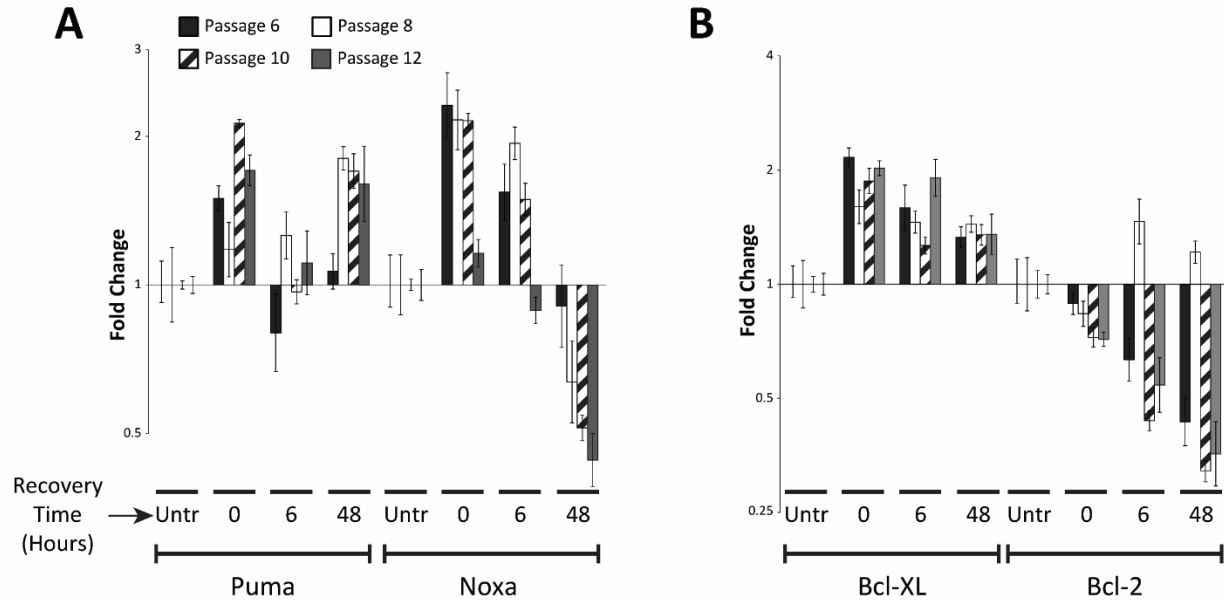

**Supplementary Figure 1.** Apoptosis associated transcriptional responses of MSCs following VP16 exposure with passage. (A) Pro-apoptotic and (B) anti-apoptotic mRNA expression evaluated by qPCR in MSCs exposed to 25 $\mu$ M VP16 for 24 hours followed by 0, 6, or 48 hours recovery in fresh medium. Fold changes are indicated relative to untreated controls.

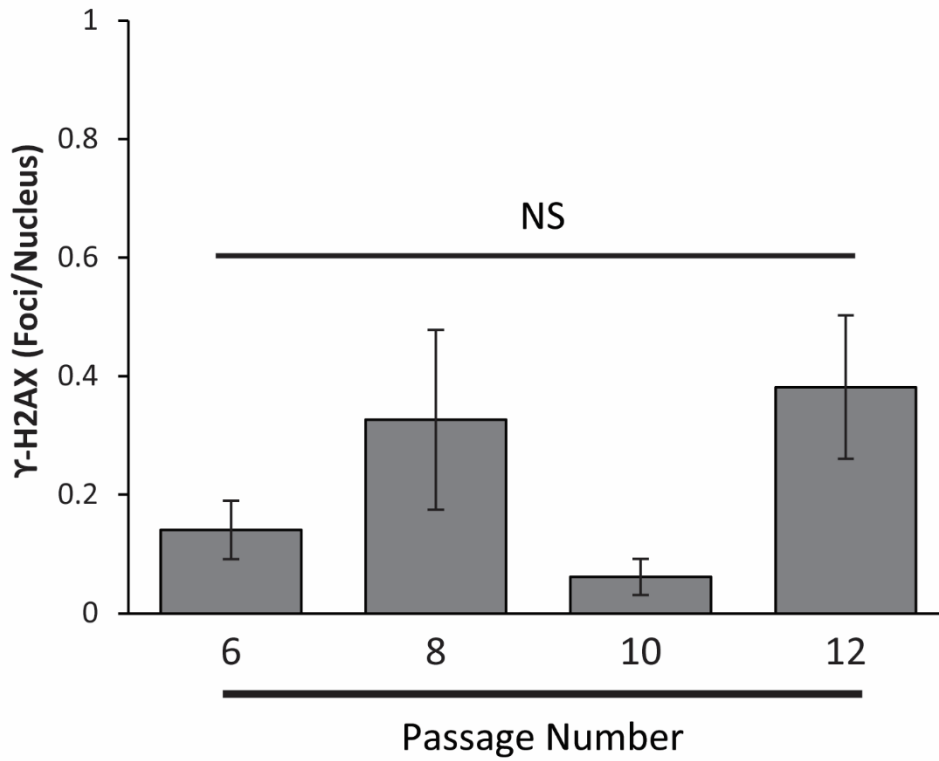

**Supplementary Figure 2.** Average number of  $\gamma$ -H2AX foci per cell in untreated MSCs for passages 6 through 12. “NS” indicates no significant difference between any passage by Kruskal-Wallis test, p-value > 0.05.

**Supplementary Table 1.** qPCR Primer sequences (5' to 3').

| <b>Gene</b>     | <b>Forward</b>          | <b>Reverse</b>             |
|-----------------|-------------------------|----------------------------|
| GUSB            | AAACGATTGCAGGGTTTCAC    | CTCTCGTCGGTGACTGTTCA       |
| CDKN1A (p21)    | CCTGGCACCTCACCTGCTC     | CGGCGTTTGGAGTGGTAGA        |
| CDKN2A (p16)    | GGGGTCGGGTAGAGGAGGT     | CCGTGGAGCAGCAGCAGC         |
| TP53 (p53)      | GCACATGACGGAGGTTGTGAG   | ATGGTGGTACAGTCAGAGCCAAC    |
| KU70            | CCAATAAAGCTCTATCGGGAAAC | TTTCTCCAGTATAATCTGACGACTCC |
| KU80            | AAAATTAAAGACTGAGCAAGGGG | TAGAACACGGAAGTTTTTCAGCAG   |
| PRKDC (DNA-PK)  | GCGAAGCACTGGCTTAGC      | CTAACACTTCATCTTTAGGGACCC   |
| XRCC2           | GCAGTTGGTGAATGGCGTT     | GCACAGGTGAATCTTCATCAGC     |
| XRCC3           | CGGCATCACTGAGCTGGC      | AGCTCTCCTGGAACGTCAGTG      |
| RAD51           | GTCTCTCTGGCAGTGATGTCCT  | TCTGTAAAGGGCGGTGGC         |
| BBC3 (Puma)     | AGACAAGAGGAGCAGCAGCG    | CTGGGTAAAGGGCAGGAGTCC      |
| PMAIP1 (Noxa)   | AGCTGGAAGTCGAGTGTGCTACT | GCAAGTTTTTGATGCAGTCAGG     |
| BCL2 (Bcl-2)    | TGTCGCAGAGGGGCTACG      | GGATGCGGCTGGATGGG          |
| BCL2L1 (Bcl-XL) | TCCAGGAGAACGGCGGC       | GAGCCCAGCAGAACCACG         |
